# Supplementary material for: Investigation of the Effect of Rice Bran Content on the Antioxidant Capacity and Related Molecular Conformations of Plant-Based Simulated Meat Based on Raman Spectroscopy
Source: MDPI journal article supplement (doi:10.3390/foods11213529), 2022-11-06
Supplement: s1 [file s1]

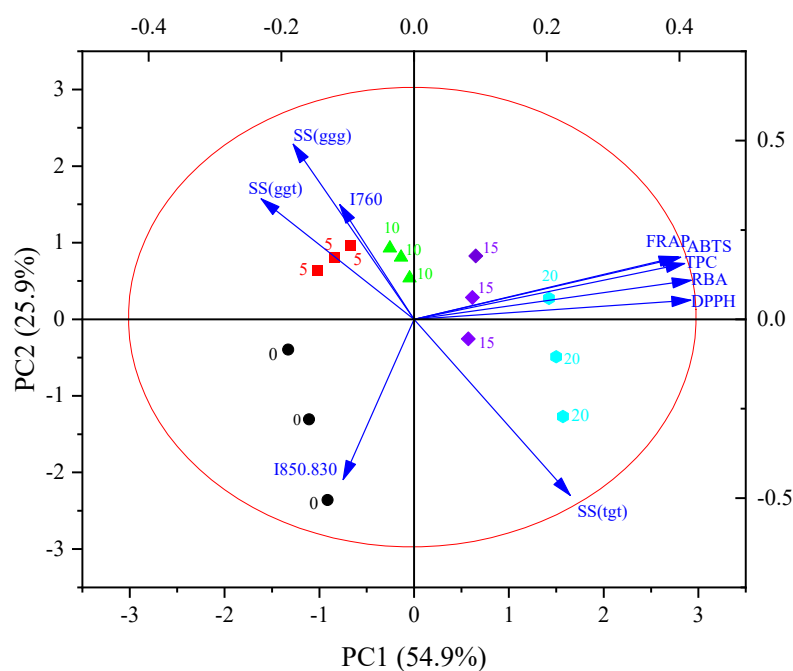

**Fig. S1.** Principal component analysis of RB-SPI plant simulated meat

Noted: RBA -- RB addition; TPC -- total phenol content; DPPH -- DPPH radical scavenging method; ABTS -- ABTS radical scavenging method; FRAP -- FRAP antioxidant capacity; I760 -- intensity of the tryptophan band at  $760\text{ cm}^{-1}$ ; I860.830 -- tyrosine doublet; SS(ggg) -- amount of disulphide bridges in the g-g-g conformation; SS(ggt) -- amount of disulphide bridges in the g-g-t conformation; SS (tgt) -- amount of disulphide bridges in the t-g-t conformation; black circles for 0% RB; red squares for 5% RB; green triangles for 10% RB; purple diamonds for 15% RB; blue hexagons for 20% RB.
